# Supplementary material for: Eya3 partners with PP2A to induce c-Myc stabilization and tumor progression
Source: PubMed Central journal article supplement (PMC5849647; doi:10.1038/s41467-018-03327-4), 2018-03-13
Supplement: 41467_2018_3327_MOESM3_ESM.pdf [file 41467_2018_3327_MOESM3_ESM.pdf]

## **Description of Additional Supplementary Files**

File Name: Supplementary Data 1

Description: All proteins identified in mass spectrometry analyses of mouse Eya3 purified from HEK293FT cells.
